# Supplementary material for: Unusual spin-polarized electron state in fullerene induced by carbon adatom defect
Source: Royal Society of Chemistry journal article supplement (doi:10.1039/c7nr02335a), 2017-01-01
Supplement: c7nr02335a1.pdf [file c7nr02335a1.pdf]

## **An unusual spin-polarized state in fullerene induced by carbon adatom defects**

**Dexuan Xu,<sup>ab</sup> Yang Gao,<sup>ab</sup> Wanrun Jiang,<sup>ab</sup> Zhigang Wang<sup>ab\*</sup>**

<sup>a</sup>Institute of Atomic and Molecular Physics, Jilin University, Changchun 130012, China.

<sup>b</sup>Jilin Provincial Key Laboratory of Applied Atomic and Molecular Spectroscopy (Jilin University),

Changchun 130012, China.

\*Corresponding author: wangzg@jlu.edu.cn ( Z. W.).

Part 1. Geometry optimization results of C<sub>61</sub>.

Part 2. The spin density distribution of three electronic states of C<sub>61</sub>.

Part 3. MOs energy diagram of C<sub>61</sub>-Def[5, 6] structure with triplet state.

Part 4. IR and Raman spectra of C<sub>61</sub>-Def[5, 6] and C<sub>61</sub>-Def[6, 6] adsorption structures.

Part 5. Energy difference between C<sub>61</sub>-Def[5, 6] and C<sub>61</sub>-Def[6, 6] adsorption structures.

Part 6. Definitions and results of binding, interaction and preparation energies.

Part 7. Typical spin density distribution of other considered fullerenes in the spin-polarized singlet electron states.

## Part 1.

Table S1. Related geometry optimization results (by Gaussian 09) of C<sub>61</sub>-Def[5, 6] and C<sub>61</sub>-Def[6, 6] with various DFT methods. 1\* represents the spin-polarized singlet state.

| System       | Functionals/Basis set | Multiplicity | ΔE (eV)      |
|--------------|-----------------------|--------------|--------------|
| Def[5, 6]    |                       | <b>1*</b>    | <b>0.000</b> |
|              | BP86/6-31G*           | 1            | 0.066        |
|              |                       | 3            | 0.136        |
|              |                       | 5            | 1.518        |
|              |                       | <b>1*</b>    | <b>0.000</b> |
|              | PBE/6-31G*            | 1            | 0.074        |
|              |                       | 3            | 0.120        |
|              |                       | 5            | 1.506        |
|              |                       | <b>1*</b>    | <b>0.000</b> |
|              | B3LYP/6-31G*          | 1            | 0.091        |
|              |                       | 3            | 0.127        |
|              |                       | 5            | 1.770        |
|              |                       | <b>1*</b>    | <b>0.000</b> |
|              | HSE06/6-31G*          | 1            | 0.165        |
|              |                       | 3            | 0.056        |
| 5            |                       | 1.685        |              |
|              | 1                     | 0.101        |              |
| BP86/6-31G*  | <b>3</b>              | <b>0.000</b> |              |
|              | 5                     | 1.439        |              |
|              |                       | 1            | 0.103        |
| PBE/6-31G*   | <b>3</b>              | <b>0.000</b> |              |
|              | 5                     | 1.439        |              |
|              |                       | 1            | 0.090        |
| B3LYP/6-31G* | <b>3</b>              | <b>0.000</b> |              |
|              | 5                     | 1.663        |              |
|              |                       | 1            | 0.083        |
| HSE06/6-31G* | <b>3</b>              | <b>0.000</b> |              |
|              | 5                     | 1.700        |              |

## Part 2.

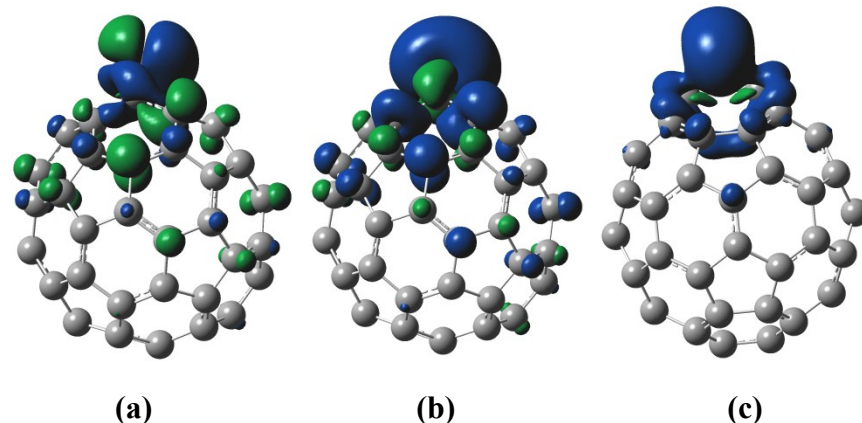

Figure S1. The spin density distribution of three spin states. (a) Def[5, 6] spin-polarized singlet state (b) Def[5, 6] triplet state (c) Def[6, 6] triplet state. The blue represents spin-up, the green represents spin-down. Calculation method is PBE/6-31G\*, isovalue is 0.002 a.u..

## Part 3.

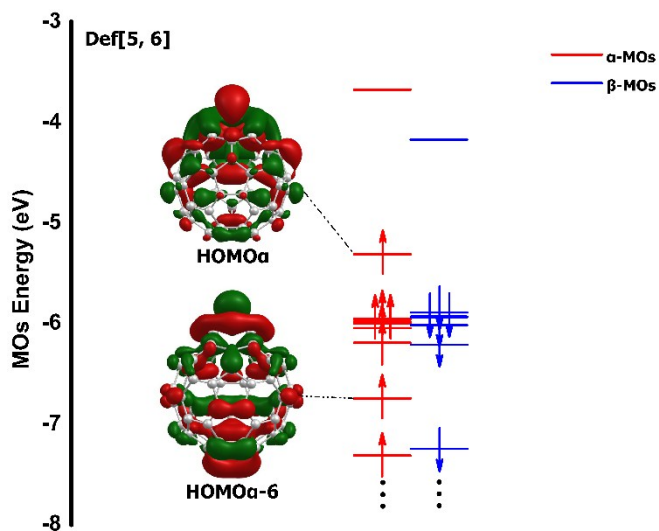

Figure S2. MOs energy diagram of Def[5, 6] structure with triplet state.

## Part 4.

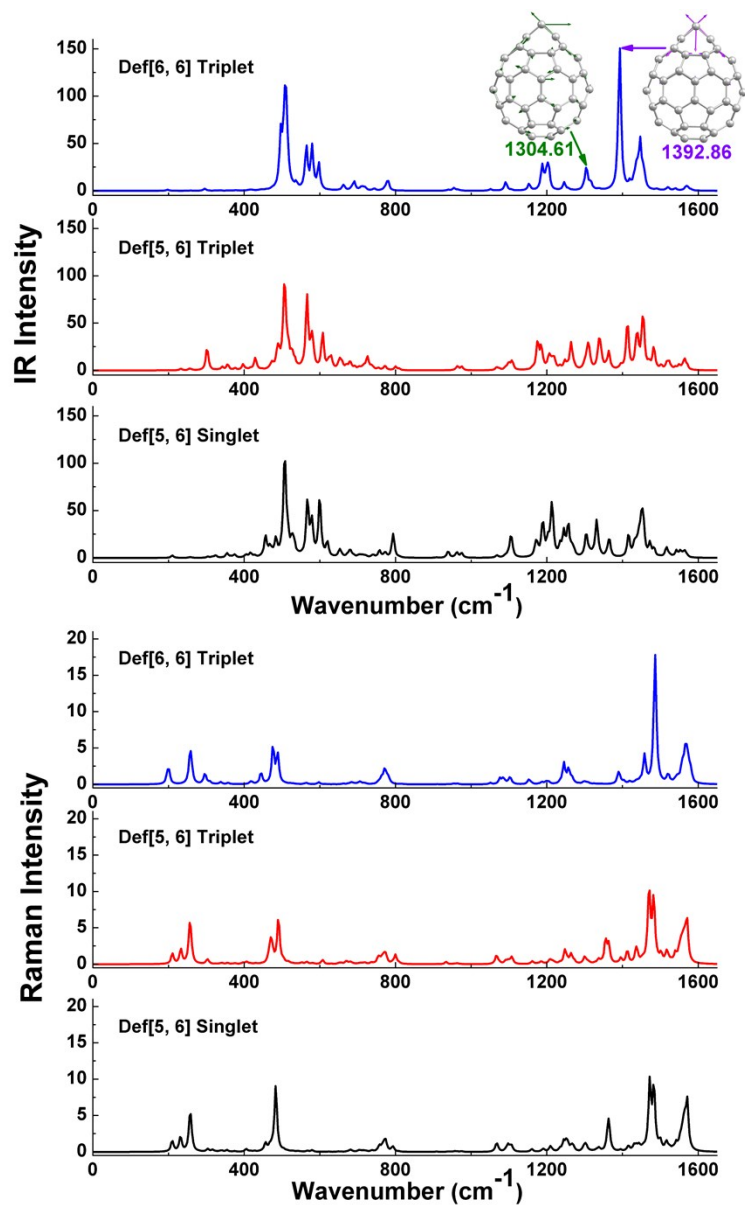

Figure S3. IR and Raman spectra of Def[5, 6] and Def[6, 6] adsorption structures. The black lines, red lines and the blue lines represent the singlet state of Def[5, 6], the triplet state of Def[5, 6] and the triplet state of Def[6, 6] respectively. The same colors correspond to the same vibration modes.

## Part 5.

Table S2. Relative energy of C<sub>61</sub>-Def[5, 6], C<sub>61</sub>-Def[6, 6] with corresponding most stable electron state.

| System          | Def[5, 6]-spin polarized singlet | Def[6, 6]-triplet |
|-----------------|----------------------------------|-------------------|
| $\Delta E$ (eV) | 0                                | 0.208             |

## Part 6.

Table S3. Binding ( $E_{bin}$ ), interaction ( $E_{int}$ ) and preparation ( $E_{prep}$ ) energies (in eV) of Def[5, 6] and Def[6, 6].

| System     | Def[5, 6] | Def[6, 6] |
|------------|-----------|-----------|
| $E_{bin}$  | 3.58      | 3.37      |
| $E_{int}$  | 6.87      | 7.09      |
| $E_{prep}$ | 3.29      | 3.72      |

To assess the thermodynamic stability of the Def[5, 6], its binding, interaction and preparation energies are computed and listed in Table S3, compared with the values of the Def[6, 6]. For characterizing the stability of a carbon adatom in fullerene, we defined its binding ( $E_{bin}$ ), interaction ( $E_{int}$ ) and preparation ( $E_{prep}$ ) energies as:

$$E_{bin/int} = (E_{iso/relaxed(C60)} + E_{adatom}) - E_T$$

$$E_{prep} = E_{int} - E_{bin}$$

where  $E_T$  is the total energy of defective fullerene,  $E_{iso(C60)}$  represents the energy of the isolated C<sub>60</sub>,  $E_{relaxed(C60)}$  denotes the energy of C<sub>60</sub> in its relaxed geometry, and  $E_{adatom}$  is the energy of carbon adatom. The final  $E_{int}$  was obtained after taking basis set superposition error (BSSE) into account. The  $E_{int}$  represents a measure of the strength of

the chemical interaction between the carbon adatom and  $C_{60}$ , a positive  $E_{int}$  means an attractive interaction; while the  $E_{bin}$  encompasses not only the energy gained due to the chemical interaction  $E_{int}$ , but also the energy paid to deform the  $C_{60}$  from its ideal configuration to the relaxed adsorption structure (i.e., preparation energy,  $E_{prep}$ ).

### Part 7.

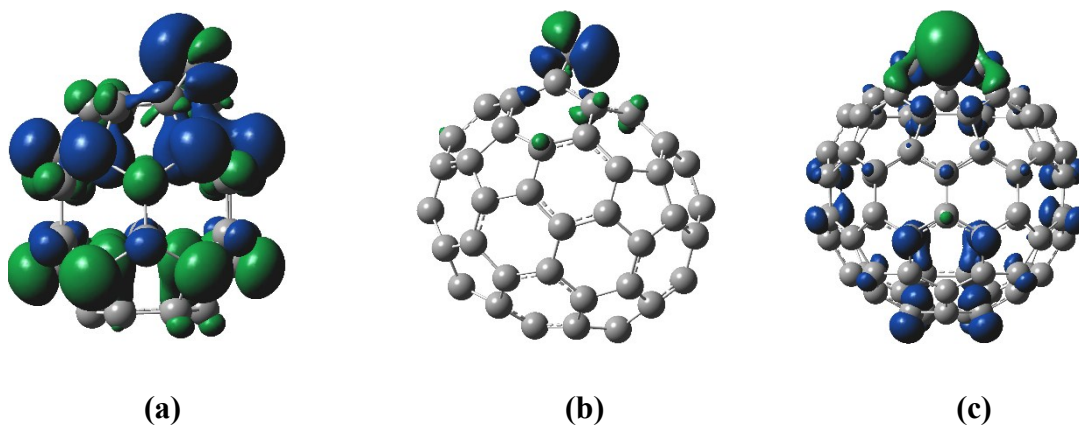

Figure S4. Typical spin density distribution of other considered fullerenes in the spin polarized singlet state (a)  $C_{37}$ -Def[5, 6], (b)  $C_{71}$ -Def[5, 6], (c)  $C_{81}$ -Def[5, 6]. Blue represents spin-up, green represents spin-down. Calculation method is PBE/6-31G\*, isovalue is 0.002 a.u..
